# Supplementary material for: The Resource Utilization of Poplar Leaves for CO2 Adsorption
Source: MDPI journal article supplement (doi:10.3390/molecules29092024), 2024-04-27
Supplement: s1 [file s1]

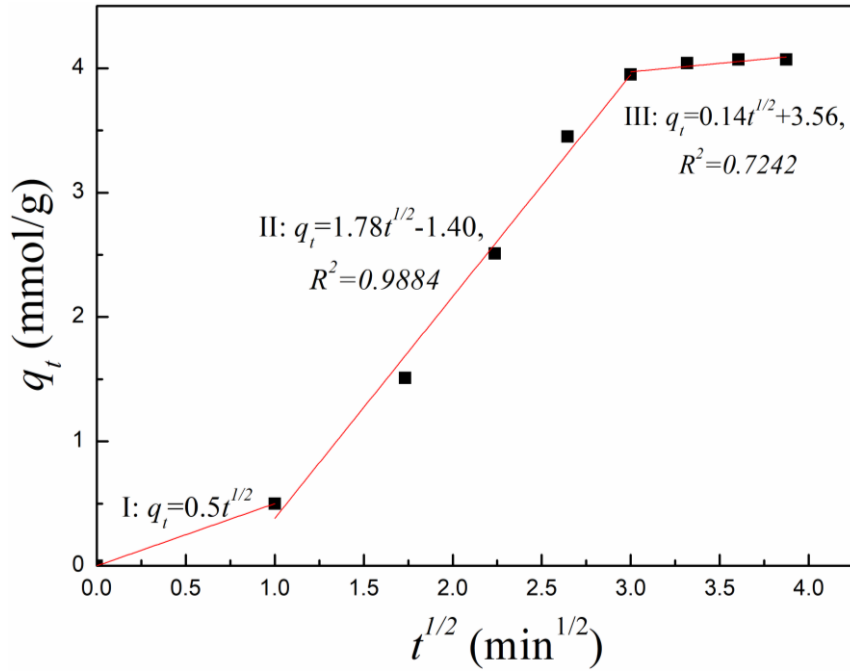

**Figure S1.** The prediction of the rate-controlling step of PH0.25N1 by the intraparticle diffusion model.

**Table S1.** The textural pore properties of H<sub>3</sub>PO<sub>4</sub>- or KOH-activated poplar leaves before and after N- doping.

| Sample     | S <sub>BET</sub><br>(m <sup>2</sup> /g) | V <sub>t</sub><br>(cm <sup>3</sup> /g) | V <sub>micro</sub><br>(cm <sup>3</sup> /g) | Micro-<br>porosity (%) | Average pore<br>diameter<br>(nm) |
|------------|-----------------------------------------|----------------------------------------|--------------------------------------------|------------------------|----------------------------------|
| PH0.25     | 705                                     | 0.40                                   | 0.08                                       | 20                     | 2.26                             |
| PH0.25N0.5 | 635                                     | 0.32                                   | 0.12                                       | 37.5                   | 2.02                             |
| PH0.25N1   | 846                                     | 0.43                                   | 0.19                                       | 44.2                   | 2.02                             |
| PH0.25N1.5 | 720                                     | 0.36                                   | 0.11                                       | 30.6                   | 2.00                             |
| PK0.5      | 499                                     | 0.30                                   | 0.08                                       | 26.7                   | 2.40                             |
| PK0.5N1    | 257                                     | 0.16                                   | 0.05                                       | 31.2                   | 2.52                             |
| PK1        | 525                                     | 0.45                                   | 0.05                                       | 11.1                   | 3.43                             |
| PK1N1      | 416                                     | 0.42                                   | 0.10                                       | 23.8                   | 4.04                             |

**Table S2.** The peak area ratios of the O species in H<sub>3</sub>PO<sub>4</sub>- or KOH-activated poplar leaves before and after N- doping.

| Sample   | O at % | O species ratio, % |       |       |       | -OH<br>at % | -C=O<br>at % | C-O at<br>% | -COOH at % |
|----------|--------|--------------------|-------|-------|-------|-------------|--------------|-------------|------------|
|          |        | -OH                | -C=O  | C-O   | -COOH |             |              |             |            |
| PH0.25   | 23.73  | 11.64              | 28.30 | 34.88 | 25.18 | 2.76        | 6.72         | 8.28        | 5.97       |
| PH0.25N1 | 19.81  | 27.28              | 29.15 | 24.27 | 19.30 | 5.40        | 5.77         | 4.81        | 3.82       |
| PK1      | 48.27  | 32.07              | 33.76 | 18.63 | 15.54 | 15.48       | 16.30        | 8.99        | 7.50       |
| PK1N1    | 35.81  | 34.00              | 32.21 | 18.32 | 15.47 | 12.18       | 11.53        | 6.56        | 5.54       |

**Table S3.** The peak area ratios of the N species in H<sub>3</sub>PO<sub>4</sub>- or KOH-activated poplar leaves before and after N- doping.

| Sample   | N at % | N species ratio, % |       |       | N-6 at % | N-5 at % | N-Q at % |
|----------|--------|--------------------|-------|-------|----------|----------|----------|
|          |        | N-6                | N-5   | N-Q   |          |          |          |
| PH0.25   | 2.21   | 10.47              | 43.30 | 46.23 | 0.23     | 0.96     | 1.02     |
| PH0.25N1 | 9.88   | 21.90              | 64.59 | 13.51 | 2.16     | 6.38     | 1.33     |
| PK1      | 2.61   | 19.94              | 80.05 | 0.01  | 0.52     | 2.09     | 0.00     |
| PK1N1    | 3.92   | 41.01              | 40.29 | 18.70 | 1.61     | 1.58     | 0.73     |
